CORRECTION

## Correction: Telemedicine via data glasses in CBRN protection suit—Evaluation of medical qualification and technical feasibility

Sarah Bovenkerk, Anna Mueller, Rolf Rossaint, Michael Czaplík, Andreas Follmann

S1 Script is omitted from the list of Supporting Information. It can be viewed below.

### Supporting information

**S1 Script. Table 1. Script for the practical study procedure.**  
(PDF)

### Reference

1. Bovenkerk S, Mueller A, Rossaint R, Czaplík M, Follmann A. Telemedicine via data glasses in CBRN protection suit—Evaluation of medical qualification and technical feasibility. PLoS One. 2025;20(5):e0324558. <https://doi.org/10.1371/journal.pone.0324558> PMID: 40435203

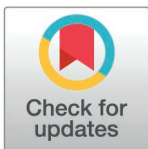

### OPEN ACCESS

**Citation:** Bovenkerk S, Mueller A, Rossaint R, Czaplík M, Follmann A (2026) Correction: Telemedicine via data glasses in CBRN protection suit—Evaluation of medical qualification and technical feasibility. PLoS One 21(6): e0352425. <https://doi.org/10.1371/journal.pone.0352425>

**Published:** June 23, 2026

**Copyright:** © 2026 Bovenkerk et al. This is an open access article distributed under the terms of the [Creative Commons Attribution License](https://creativecommons.org/licenses/by/4.0/), which permits unrestricted use, distribution, and reproduction in any medium, provided the original author and source are credited.
